# Supplementary material for: Stearic acid/fumed silica/Fe3O4 composite phase change materials with low thermal conductivities and magnetically accelerated heating performance for wearable thermotherapy
Source: Royal Society of Chemistry journal article supplement (doi:10.1039/d5na00133a), 2025-01-01
Supplement: d5na00133a1.pdf [file d5na00133a1.pdf]

## Supplemental Information

Stearic Acid/Fumed Silica/Fe<sub>3</sub>O<sub>4</sub> Composite Phase Change Materials with Low Thermal  
Conductivities and Magnetically Accelerated Heating Performance for Wearable  
Thermotherapy

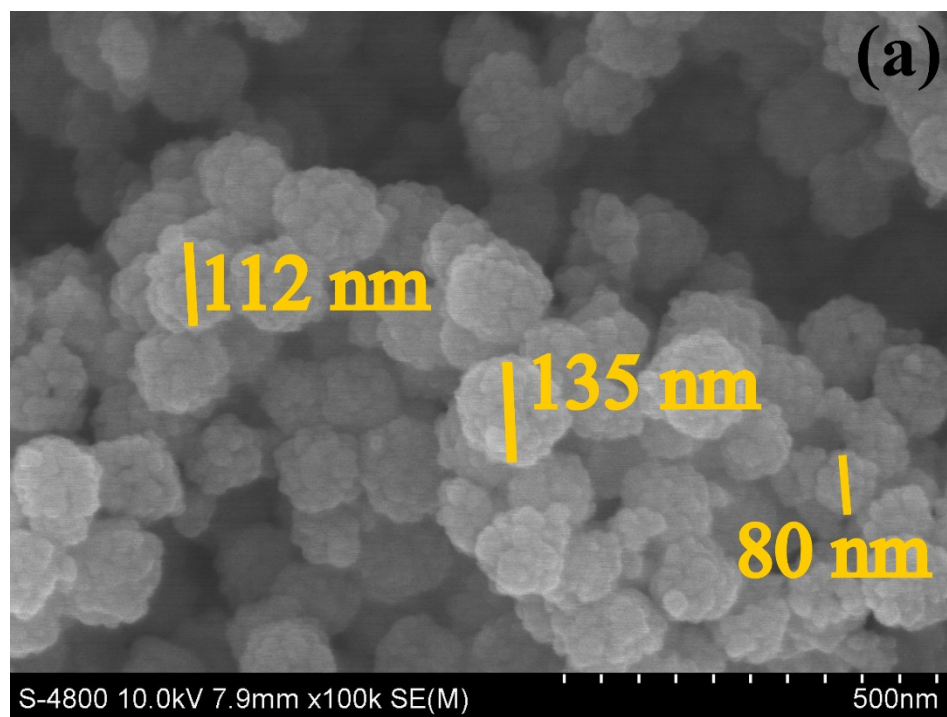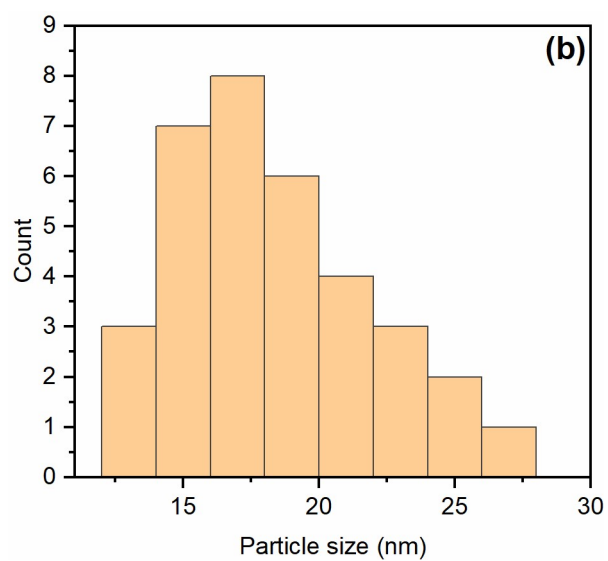

Figure S1. (a) SEM image and (b) particle size distribution of the prepared Fe<sub>3</sub>O<sub>4</sub> NPs.
